# Supplementary material for: Design of Turmeric Rhizome Extract Nano-Formula for Delivery to Cancer Cells
Source: MDPI journal article supplement (doi:10.3390/molecules27030896), 2022-01-28
Supplement: s1 [file s1]

# Design of turmeric rhizome extract nano- formula for delivery to cancer cells

**Table S1.** Physicochemical properties of turmeric rhizome extract nanoparticles formulation obtained from mixture-process variables experimental design.

| Formulation | Y <sub>m1</sub> | Y <sub>m2</sub> | Y <sub>m3</sub> | Y <sub>m4</sub> | Y <sub>m5</sub> | Y <sub>m6</sub> | Y <sub>m7</sub> | Y <sub>m8</sub> |
|-------------|-----------------|-----------------|-----------------|-----------------|-----------------|-----------------|-----------------|-----------------|
| M01         | 77.28           | 66.24           | 54.38           | 35.08           | 160.4           | 171.0           | 285.3           | 0.150           |
| M02         | 1.81            | 1.03            | <u>0.00</u>     | <u>0.00</u>     | 182.1           | 200.0           | 363.3           | 0.161           |
| M03         | 150.41          | 71.61           | 65.88           | 54.40           | 171.2           | 223.0           | 452.3           | 0.302           |
| M04         | 181.49          | 63.77           | 57.93           | 49.05           | 187.2           | 238.0           | 526.3           | 0.329           |
| M05         | 7.95            | 68.96           | 60.77           | 45.39           | 205.5           | 298.0           | 645.3           | 0.490           |
| M06         | 86.93           | 65.91           | 66.53           | 68.06           | 165.2           | 178.3           | 280.3           | 0.124           |
| M07         | 38.89           | 58.69           | 60.92           | 66.12           | 200.8           | 293.0           | 561.3           | 0.416           |
| M08         | 9.08            | 40.10           | 59.44           | 70.01           | 255.8           | 476.7           | 926.3           | 0.571           |
| M09         | <u>0.00</u>     | <u>0.00</u>     | <u>0.00</u>     | <u>0.00</u>     | 191.3           | 212.7           | 368.3           | 0.161           |
| M10         | 89.65           | 93.46           | 80.13           | 75.51           | 163.6           | 178.0           | 304.3           | 0.154           |
| M11         | 83.87           | 60.11           | 38.35           | 18.18           | 197.4           | 249.7           | 924.7           | 0.442           |
| M12         | 5.22            | 30.51           | 45.28           | 68.15           | 253.9           | 395.0           | 766.0           | 0.535           |
| M13         | 52.39           | 68.55           | 42.50           | 19.29           | 196.7           | 280.0           | 612.0           | 0.442           |
| M14         | 1.77            | 1.04            | <u>0.00</u>     | <u>0.00</u>     | <u>281.3</u>    | <u>477.3</u>    | 985.0           | 0.572           |
| M15         | 76.78           | 21.43           | 36.60           | 53.73           | 232.3           | 395.7           | 871.7           | <u>0.601</u>    |
| M16         | 221.63          | 55.13           | 48.47           | 28.40           | 167.9           | 177.7           | 292.3           | 0.152           |
| M17         | 134.01          | 70.09           | 75.02           | 73.84           | 162.5           | 173.0           | 262.7           | 0.113           |
| M18         | 306.06          | 81.87           | 85.17           | 85.48           | 198.5           | 298.3           | 654.0           | 0.477           |
| M19         | 0.41            | 10.86           | <u>0.00</u>     | <u>0.00</u>     | 272.3           | 444.3           | 924.7           | 0.556           |
| M20         | 214.68          | 55.13           | 42.63           | 21.77           | 201.5           | 305.0           | 637.0           | 0.469           |
| M21         | 173.88          | 88.10           | 89.58           | 86.21           | 160.6           | 172.3           | 268.0           | 0.113           |
| M22         | 3.91            | 4.48            | <u>0.00</u>     | <u>0.00</u>     | 275.1           | 469.3           | 957.3           | 0.570           |
| M23         | <u>348.67</u>   | 90.35           | 87.43           | 84.52           | 154.9           | 164.3           | 251.3           | 0.105           |
| M24         | 180.27          | 64.35           | 62.88           | 67.28           | 218.4           | 319.3           | 708.3           | 0.463           |
| M25         | 121.35          | 44.44           | 50.21           | 66.45           | 175.9           | 190.0           | 312.3           | 0.140           |
| M26         | 141.81          | 61.79           | 39.76           | 18.35           | 158.2           | 171.7           | 277.3           | 0.136           |
| M27         | 174.35          | 81.69           | 73.15           | 59.58           | 147.1           | 156.7           | 244.3           | 0.106           |
| M28         | 169.80          | 82.13           | 78.22           | 70.65           | 191.9           | 293.0           | 558.0           | 0.477           |
| M29         | 174.91          | 47.29           | 60.62           | 70.71           | 162.5           | 175.0           | 270.3           | 0.118           |
| M30         | 36.68           | 13.86           | 27.38           | 53.74           | 260.8           | 431.7           | <u>989.7</u>    | 0.554           |
| M31         | 62.81           | 62.43           | 78.65           | <u>107.70</u>   | 174.3           | 188.7           | 304.7           | 0.153           |
| M32         | 253.11          | 87.53           | 77.95           | 76.87           | 169.6           | 183.3           | 308.0           | 0.150           |
| M33         | 182.67          | 58.79           | 39.17           | 19.21           | 180.7           | 223.7           | 530.3           | 0.282           |
| M34         | 280.81          | 95.22           | 88.46           | 90.77           | 170.2           | 215.3           | 402.3           | 0.283           |
| M35         | <u>0.00</u>     | <u>0.00</u>     | <u>0.00</u>     | <u>0.00</u>     | 231.7           | 322.3           | 619.3           | 0.360           |
| M36         | 42.98           | 23.37           | 40.70           | 62.65           | 212.2           | 322.0           | 671.7           | 0.452           |
| M37         | 253.35          | <u>112.02</u>   | <u>98.40</u>    | 89.50           | 187.4           | 242.3           | 462.3           | 0.303           |
| M38         | 81.49           | 22.39           | 34.10           | 52.70           | 207.4           | 268.0           | 535.0           | 0.345           |
| M39         | 1.94            | 2.17            | <u>0.00</u>     | <u>0.00</u>     | 203.1           | 252.0           | 509.3           | 0.271           |
| M40         | 58.97           | 51.69           | 70.63           | 82.64           | 219.3           | 337.7           | 769.7           | 0.522           |
| M41         | 38.79           | 19.56           | 39.56           | 66.21           | 226.7           | 340.0           | 748.3           | 0.494           |

---

|     |        |        |       |        |              |              |              |              |
|-----|--------|--------|-------|--------|--------------|--------------|--------------|--------------|
| M42 | 205.83 | 69.20  | 72.95 | 81.77  | 172.1        | 198.0        | 400.3        | 0.234        |
| M43 | 183.30 | 59.93  | 38.80 | 18.39  | 204.2        | 299.3        | 615.0        | 0.455        |
| M44 | 170.12 | 81.00  | 69.33 | 53.16  | 163.7        | 207.3        | 410.3        | 0.285        |
| M45 | 32.72  | 18.07  | 35.80 | 64.46  | 263.1        | 404.3        | 891.0        | 0.537        |
| M46 | 162.42 | 76.10  | 66.83 | 50.36  | <u>144.5</u> | <u>152.3</u> | <u>238.7</u> | <u>0.104</u> |
| M47 | 142.33 | 62.02  | 39.28 | 18.24  | 174.1        | 184.7        | 326.7        | 0.149        |
| Min | 0.00   | 0.00   | 0.00  | 0.00   | 144.5        | 152.3        | 238.7        | 0.104        |
| Max | 348.67 | 112.02 | 98.40 | 107.70 | 281.3        | 477.3        | 989.7        | 0.601        |

Y<sub>m1</sub> = curcumin content (μM), Y<sub>m2</sub> = % label amount of curcumin (%LA), Y<sub>m3</sub> = % label amount of desmethoxycurcumin (%LA), Y<sub>m4</sub> = % label amount of bisdesmethoxycurcumin (%LA), Y<sub>m5</sub> = z-average (nm), Y<sub>m6</sub> = d<sub>50</sub> (nm), Y<sub>m7</sub> = d<sub>90</sub> (nm), and Y<sub>m8</sub> = Polydispersible index (PDI). Underlined values represent the designed formulation with minimum or maximum dependent variable values.
